# Supplementary material for: Incorporating winter mixed cover crops into spring maize improves nitrogen-utilization efficiency and environmental benefits on the North China Plain
Source: Research Square preprint supplement (doi:10.21203/rs.3.rs-2589631/v1), 2023-03-13
Supplement: Supplementary file 1 [file 6efb3868ad3b283fbb6ae04c.docx]

**Incorporating winter mixed cover crops into spring maize improves nitrogen-utilization efficiency and environmental benefits on the North China Plain**

Bowen Maa, Hans Lambersa,b, Prakash Lakshmananc, Wenfeng Huanga, Zhengyuan Lianga,d, Shingirai Mudarea, Jingying Jinge, Wen-Feng Conga,*

a College of Resources and Environmental Sciences; National Academy of Agriculture Green Development; Key Laboratory of Plant-Soil Interactions, Ministry of Education, China Agricultural University, Beijing 100193, China

b School of Biological Sciences and Institute of Agriculture, The University of Western Australia, Perth, WA009, Australia

c Sugarcane Research Institute; Key Laboratory of Sugarcane Biotechnology and Genetic Improvement (Guangxi), Ministry of Agriculture and Rural Affairs, Guangxi Academy of Agricultural Sciences, Nanning 530007, China

d Farming Systems Ecology, Wageningen University and Research, P.O. Box 430, 6700, AK, Wageningen, the Netherlands

e College of Grassland Science and Technology, China Agricultural University, Beijing 100193, China

* **Corresponding author:** College of Resources and Environmental Sciences; National Academy of Agriculture Green Development; Key Laboratory of Plant-Soil Interactions, Ministry of Education, China Agricultural University, Beijing 100193, China

Email address: [wenfeng.cong@cau.edu.cn](mailto:wenfeng.cong@cau.edu.cn) (W.-F. Cong)

Fig. S1. Precipitation from November 2019 to November 2020

Fig. S2. Daily average temperature from November 2019 to November 2020

**Table S1**

The amounts of agricultural inputs in four cropping systems. Fal., fallow-spring maize cropping system; HV, hairy vetch-spring maize cropping system; OV, February orchid-spring maize cropping system; HO, hairy vetch/ February orchid mixture -spring maize cropping system.

| Items | Units | Fal. | HV | OV | HO |
| --- | --- | --- | --- | --- | --- |
| Nitrogenous fertilizer (N) | kg ha-1 | 273 | 191 | 248 | 197 |
| Phosphate fertilizer (P) | kg ha-1 | 20 | 20 | 20 | 20 |
| Potash fertilizer (K) | kg ha-1 | 75 | 75 | 75 | 75 |
| Hairy vetch seeds | kg ha-1 | 0 | 60 | 0 | 30 |
| February orchid seeds | kg ha-1 | 0 | 0 | 30 | 15 |
| Maize seeds | kg ha-1 | 2.6 | 2.6 | 2.6 | 2.6 |
| Electricity | kwh ha-1 | 1793 | 1793 | 1793 | 1793 |
| Diesel | L ha-1 | 46 | 46 | 46 | 46 |
| Labor | days p ha-1a | 10 | 15 | 15 | 15 |
| Pesticides | kg ha- | 3.8 | 3.8 | 3.8 | 3.8 |

a d p ha-1 means the number of labor days it takes a farmer per hectare

**Table S2**

Factors of greenhouse gas emission of different agricultural materials input considered during estimation.

| Inputs | Emission factors | Source |
| --- | --- | --- |
| Urea | 2.39 kg CO2eq kg-1 | CLCD 0.7a |
| Phosphate fertilizer | 0.3 kg CO2eq kg-1 | CLCD 0.7 |
| Potash fertilizer | 0.25 kg CO2eq kg-1 | CLCD 0.7 |
| Maize seeds | 1.93 kg CO2eq kg-1 | Ecoinvent 2.2b |
| Electricity for irrigation | 1.23 kg CO2eq kg-1 | CLCD 0.7 |
| Diesel in machine | 0.89 kg CO2eq kg-1 | CLCD 0.7 |
| Labor | 0.86 kg CO2eq kg-1 | CLCD 0.7 |
| Pesticides | 12.44 kg CO2eq kg-1 | Ecoinvent 2.2 |

a CLCD means Chinese Life Cycle Database Version 0.7

b Ecoinvent 2.2 means Ecoinvent Database Version 2.2 (http://www.ecoinvent.org)
